# Supplementary material for: Statistical behaviour of laser-induced plasma and its complementary characteristic signals
Source: Royal Society of Chemistry journal article supplement (doi:10.1039/d4ja00126e), 2024-01-01
Supplement: d4ja00126e1.pdf [file d4ja00126e1.pdf]

## Statistical behaviour of Laser-Induced Plasma and its complementary characteristic signals

Received 00th January 20xx.  
Accepted 00th January 20xx

Jakub Buday<sup>ab†</sup>, Daniel Holub<sup>ab</sup>, Pavel Pořízka<sup>ab</sup>, Jozef Kaiser<sup>ab</sup>

DOI: 10.1039/x0xx00000x

### Supplementary data

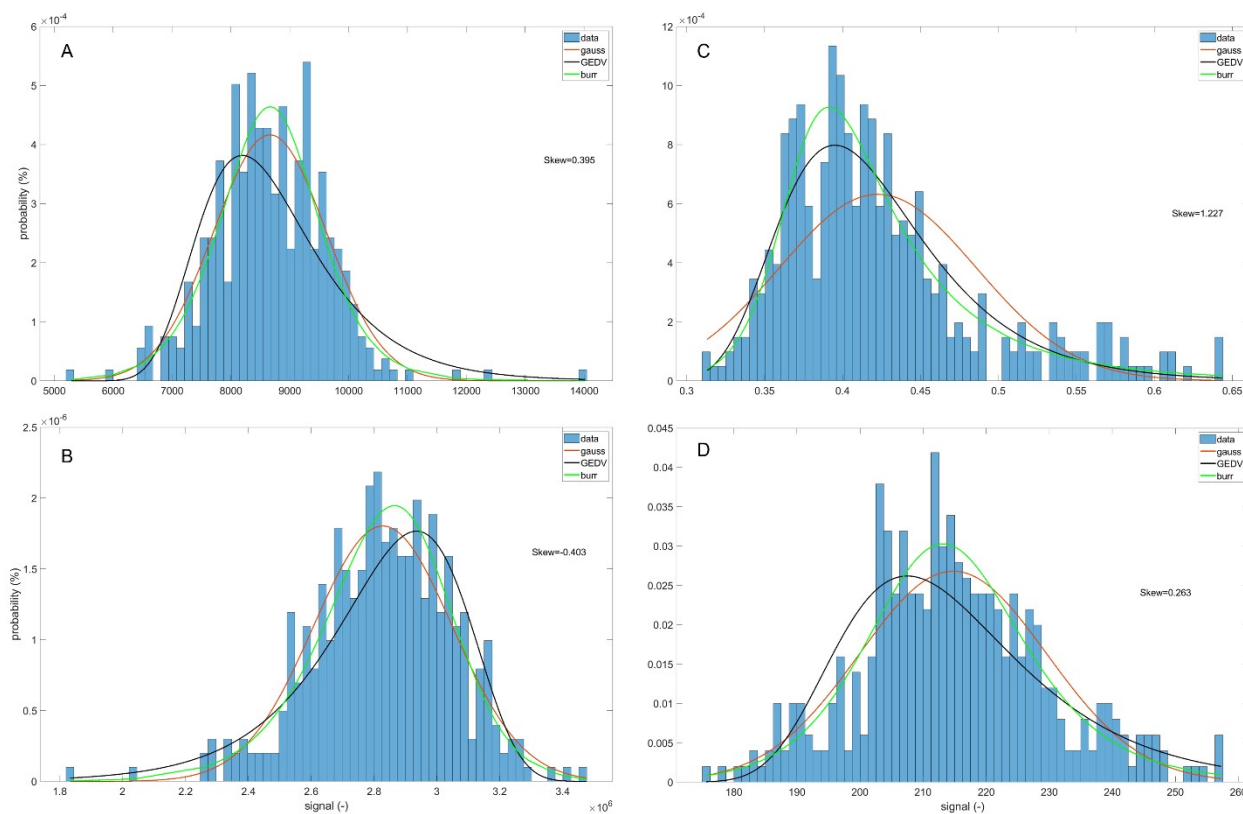

Figure 1S: CDF of Fe I 373.49 nm (A); total spectral intensity (B); size of the plasma plume (C); and sound intensity (D). Irradiance is 6.25 GW/cm<sup>2</sup>. The data set is 400 points for each observed parameter.

<sup>a</sup> Faculty of Mechanical Engineering, Brno University of Technology, Technická 2896/2, Brno, Czech Republic.

<sup>b</sup> CEITEC BUT, Central European Institute of Technology, Brno University of Technology, Purkyňova 123, 612 00 Brno, Czech Republic.

† Corresponding author: buday@vutbr.cz

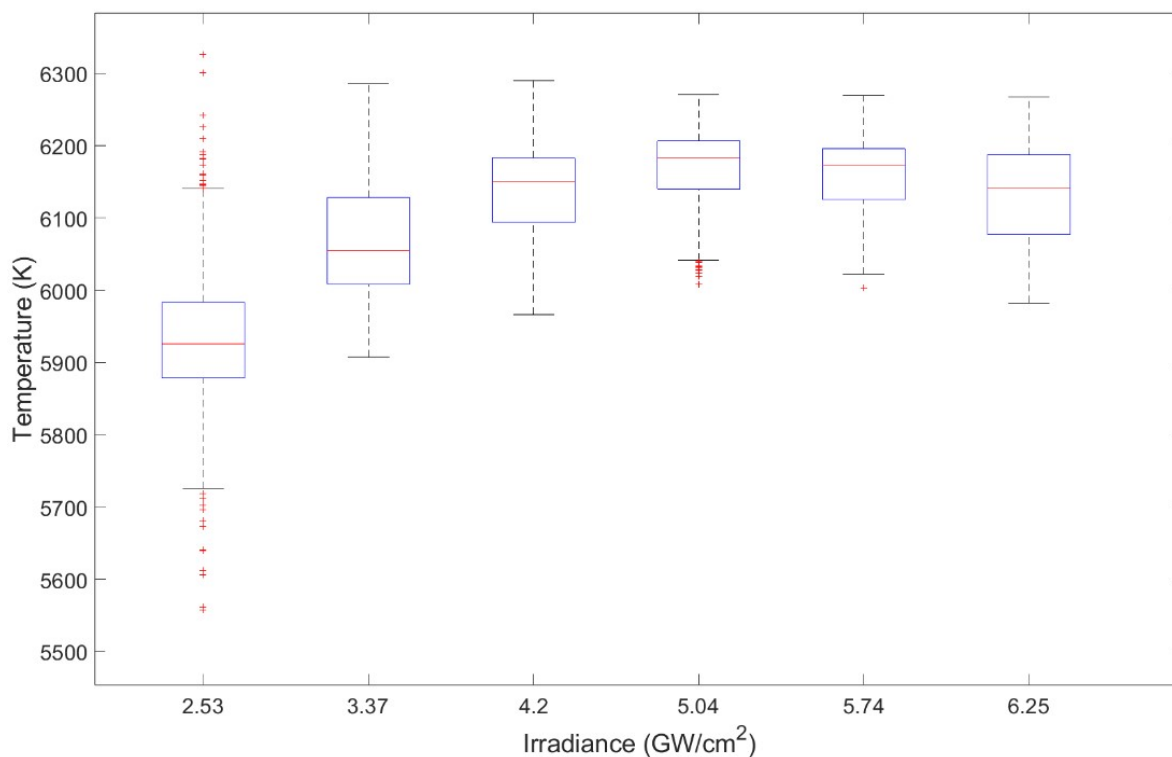

Figure 2S: Temperature of the plasma plume dependence on the laser irradiance (A). The data set is 900 data points. 1.72 GW/cm<sup>2</sup> is missing compared to the 400 data set.

Table 1S: Results of Kolmogorov-Smirnov Test comparing Gaussian, GEV, and Burr distribution, and skewness of the selected data for all the measured irradiances. The data set is 900 data points, hence the Kolmogorov-Smirnov condition  $D=0.0453$ . The highlighted values represent fulfilling the null hypothesis of a specific model for individual laser irradiances.

| Signal          | Irradiance (GW/cm <sup>2</sup> ) | Gauss         | GEV           | Burr          |
|-----------------|----------------------------------|---------------|---------------|---------------|
| Plasma plume    | 2.53                             | <b>0.0400</b> | 0.0689        | <b>0.0411</b> |
|                 | 3.37                             | <b>0.0411</b> | 0.0589        | 0.0478        |
|                 | 4.20                             | 0.0512        | 0.0679        | <b>0.0437</b> |
|                 | 5.04                             | 0.0654        | 0.0654        | 0.0491        |
|                 | 5.74                             | 0.0675        | 0.0573        | <b>0.0429</b> |
|                 | 6.25                             | 0.0667        | <b>0.0411</b> | 0.0456        |
| Sound intensity | 2.53                             | 0.0467        | 0.0756        | 0.0537        |
|                 | 3.37                             | 0.0478        | 0.0767        | 0.0478        |
|                 | 4.20                             | 0.0533        | 0.0511        | <b>0.0400</b> |
|                 | 5.04                             | 0.0644        | <b>0.0389</b> | 0.0522        |
|                 | 5.74                             | 0.0589        | 0.0533        | 0.0589        |
|                 | 6.25                             | 0.0644        | <b>0.0344</b> | <b>0.0433</b> |
| Fe I 373.49 nm  | 2.53                             | 0.0756        | 0.0478        | <b>0.0433</b> |
|                 | 3.37                             | 0.0567        | 0.0533        | 0.0578        |
|                 | 4.20                             | 0.0856        | <b>0.0278</b> | <b>0.0422</b> |
|                 | 5.04                             | 0.0633        | 0.0778        | <b>0.0411</b> |
|                 | 5.74                             | 0.0711        | 0.1711        | <b>0.0322</b> |
|                 | 6.25                             | 0.0500        | 0.0533        | 0.0589        |
| Cu I 324.74     | 2.53                             | 0.0633        | 0.0511        | <b>0.0378</b> |
|                 | 3.37                             | 0.0478        | 0.0600        | 0.0567        |
|                 | 4.20                             | 0.0867        | <b>0.0222</b> | <b>0.0389</b> |
|                 | 5.04                             | 0.0744        | 0.1811        | <b>0.0356</b> |

Journal Name

ARTICLE

|                            |      |               |               |               |
|----------------------------|------|---------------|---------------|---------------|
|                            | 5.74 | 0.0722        | 0.1778        | <b>0.0344</b> |
|                            | 6.25 | 0.0467        | 0.0633        | 0.0511        |
| <i>Ni I 352.44</i>         | 2.53 | 0.0744        | 0.0478        | <b>0.0356</b> |
|                            | 3.37 | 0.0478        | 0.0544        | 0.0500        |
|                            | 4.20 | 0.0922        | <b>0.0244</b> | <b>0.0389</b> |
|                            | 5.04 | 0.0744        | 0.1878        | <b>0.0367</b> |
|                            | 5.74 | 0.0811        | 0.1756        | 0.0456        |
|                            | 6.25 | 0.0467        | <b>0.0444</b> | 0.0449        |
| <i>Total sp. intensity</i> | 2.53 | 0.0689        | 0.0456        | 0.0544        |
|                            | 3.37 | 0.0511        | 0.0544        | 0.0511        |
|                            | 4.20 | 0.0539        | 0.0598        | 0.0479        |
|                            | 5.04 | 0.0767        | 0.0711        | <b>0.0367</b> |
|                            | 5.74 | 0.0867        | 0.0722        | <b>0.0378</b> |
|                            | 6.25 | <b>0.0444</b> | 0.0644        | 0.0500        |
| <i>Average</i>             |      | 0.0628        | 0.0714        | <b>0.0453</b> |

Table 2S: Results of Kolmogorov-Smirnov Test comparing Gaussian, GEV, and Burr distribution, and skewness of the selected data for all the measured irradiances. The original data set is 400 data points, with randomly averaging 5 data points for each observation individually, resulting in 80 data points. Hence the Kolmogorov-Smirnov

| <i>Signal</i>              | <i>Irradiance (GW/cm<sup>2</sup>)</i> | <i>Gauss</i>  | <i>GEV</i>    | <i>Burr</i>   |
|----------------------------|---------------------------------------|---------------|---------------|---------------|
| <i>Plasma plume</i>        | 1.72                                  | <b>0.1375</b> | <b>0.1250</b> | <b>0.1250</b> |
|                            | 2.53                                  | 0.1750        | <b>0.1125</b> | <b>0.1250</b> |
|                            | 3.37                                  | <b>0.1125</b> | <b>0.1500</b> | 0.1625        |
|                            | 4.20                                  | <b>0.1250</b> | <b>0.1125</b> | <b>0.1500</b> |
|                            | 5.04                                  | 0.1625        | <b>0.1125</b> | 0.1625        |
|                            | 5.74                                  | 0.1750        | <b>0.1125</b> | <b>0.1500</b> |
| <i>Sound intensity</i>     | 6.25                                  | <b>0.1125</b> | <b>0.1500</b> | <b>0.1375</b> |
|                            | 1.72                                  | <b>0.1250</b> | <b>0.1250</b> | <b>0.1250</b> |
|                            | 2.53                                  | <b>0.1250</b> | <b>0.1375</b> | <b>0.1250</b> |
|                            | 3.37                                  | <b>0.0875</b> | <b>0.1500</b> | <b>0.1250</b> |
|                            | 4.20                                  | <b>0.1375</b> | 0.1625        | <b>0.1375</b> |
|                            | 5.04                                  | <b>0.1500</b> | <b>0.1125</b> | <b>0.1500</b> |
| <i>Fe I 373.49 nm</i>      | 5.74                                  | <b>0.1375</b> | 0.2125        | <b>0.1000</b> |
|                            | 6.25                                  | <b>0.1125</b> | <b>0.1500</b> | <b>0.1375</b> |
|                            | 1.72                                  | <b>0.1375</b> | <b>0.1000</b> | <b>0.1250</b> |
|                            | 2.53                                  | <b>0.1000</b> | <b>0.1250</b> | <b>0.1500</b> |
|                            | 3.37                                  | <b>0.0875</b> | <b>0.1250</b> | <b>0.1500</b> |
|                            | 4.20                                  | 0.1625        | <b>0.1250</b> | <b>0.1500</b> |
| <i>Cu I 324.74 nm</i>      | 5.04                                  | 0.1625        | <b>0.1250</b> | <b>0.1375</b> |
|                            | 5.74                                  | 0.1750        | <b>0.1375</b> | <b>0.1375</b> |
|                            | 6.25                                  | 0.1625        | <b>0.1250</b> | <b>0.1375</b> |
|                            | 1.72                                  | <b>0.1000</b> | <b>0.1125</b> | <b>0.1375</b> |
|                            | 2.53                                  | <b>0.1125</b> | <b>0.1375</b> | <b>0.1500</b> |
|                            | 3.37                                  | <b>0.1000</b> | <b>0.1250</b> | <b>0.1375</b> |
| <i>Ni I 352.44 nm</i>      | 4.20                                  | <b>0.1250</b> | <b>0.1125</b> | <b>0.1500</b> |
|                            | 5.04                                  | <b>0.1250</b> | <b>0.1000</b> | <b>0.1500</b> |
|                            | 5.74                                  | 0.1875        | <b>0.1250</b> | <b>0.1375</b> |
|                            | 6.25                                  | <b>0.1500</b> | <b>0.1375</b> | <b>0.1125</b> |
|                            | 1.72                                  | <b>0.1000</b> | <b>0.1250</b> | <b>0.1500</b> |
|                            | 2.53                                  | <b>0.1125</b> | <b>0.1250</b> | <b>0.1500</b> |
| <i>Total sp. intensity</i> | 3.37                                  | <b>0.1000</b> | <b>0.1375</b> | <b>0.1375</b> |
|                            | 4.20                                  | <b>0.1375</b> | <b>0.1125</b> | <b>0.1375</b> |
|                            | 5.04                                  | 0.1750        | <b>0.1000</b> | <b>0.1375</b> |
|                            | 5.74                                  | 0.2125        | <b>0.1500</b> | <b>0.1375</b> |
|                            | 6.25                                  | 0.1875        | <b>0.1250</b> | <b>0.1500</b> |
|                            | 1.72                                  | 0.1750        | <b>0.1000</b> | <b>0.1250</b> |
| <i>Average</i>             | 2.53                                  | <b>0.1250</b> | <b>0.1375</b> | 0.1625        |
|                            | 3.37                                  | <b>0.1250</b> | <b>0.1500</b> | 0.1750        |
|                            | 4.20                                  | <b>0.1500</b> | <b>0.1375</b> | <b>0.1500</b> |
|                            | 5.04                                  | <b>0.1500</b> | <b>0.1000</b> | <b>0.1375</b> |
|                            | 5.74                                  | <b>0.1500</b> | <b>0.1375</b> | <b>0.1375</b> |
|                            | 6.25                                  | <b>0.1500</b> | <b>0.1375</b> | <b>0.1375</b> |
| <i>Average</i>             |                                       | <b>0.1384</b> | <b>0.1289</b> | <b>0.1405</b> |

Smirnov condition  $D=0.1520$ . The highlighted values represent fulfilling the null hypothesis of a specific model for individual laser irradiances.

Table 35: Results of Kolmogorov-Smirnov Test comparing Gaussian, GEV, and Burr distribution, and skewness of the selected data for all the measured irradiances. The original data set is 900 data points, with randomly averaging 4 data points for each observation individually, resulting in 225 data points. Hence the Kolmogorov-Smirnov condition  $D=0.0907$ . The highlighted values represent fulfilling the null hypothesis of a specific model for individual laser irradiances.

| Signal              | Irradiance<br>(GW/cm <sup>2</sup> ) | Gauss         | GEV           | Burr          |
|---------------------|-------------------------------------|---------------|---------------|---------------|
| Plasma plume        | 2.53                                | <b>0.0667</b> | 0.0978        | <b>0.0622</b> |
|                     | 3.37                                | <b>0.0711</b> | 0.0933        | <b>0.0756</b> |
|                     | 4.20                                | <b>0.0756</b> | <b>0.0622</b> | <b>0.0844</b> |
|                     | 5.04                                | 0.0933        | 0.1022        | <b>0.0667</b> |
|                     | 5.74                                | <b>0.0733</b> | 0.0919        | <b>0.0642</b> |
|                     | 6.25                                | <b>0.0533</b> | <b>0.0889</b> | <b>0.0622</b> |
| Sound intensity     | 2.53                                | <b>0.0533</b> | <b>0.0711</b> | <b>0.0667</b> |
|                     | 3.37                                | <b>0.0489</b> | 0.0933        | <b>0.0667</b> |
|                     | 4.20                                | <b>0.0622</b> | <b>0.0756</b> | <b>0.0667</b> |
|                     | 5.04                                | 0.1200        | <b>0.0622</b> | <b>0.0533</b> |
|                     | 5.74                                | <b>0.0889</b> | <b>0.0800</b> | <b>0.0667</b> |
|                     | 6.25                                | <b>0.0711</b> | <b>0.0844</b> | <b>0.0800</b> |
| Fe I 373.49 nm      | 2.53                                | <b>0.0844</b> | <b>0.0844</b> | <b>0.0578</b> |
|                     | 3.37                                | <b>0.0889</b> | 0.1244        | <b>0.0844</b> |
|                     | 4.20                                | 0.0933        | <b>0.0667</b> | <b>0.0578</b> |
|                     | 5.04                                | 0.1111        | <b>0.0889</b> | <b>0.0533</b> |
|                     | 5.74                                | <b>0.0800</b> | <b>0.0889</b> | <b>0.0622</b> |
|                     | 6.25                                | <b>0.0711</b> | 0.0933        | <b>0.0622</b> |
| Cu I 324.74         | 2.53                                | <b>0.0667</b> | <b>0.0756</b> | <b>0.0667</b> |
|                     | 3.37                                | <b>0.0667</b> | 0.0978        | <b>0.0889</b> |
|                     | 4.20                                | 0.1022        | <b>0.0711</b> | <b>0.0622</b> |
|                     | 5.04                                | 0.0933        | <b>0.0844</b> | <b>0.0622</b> |
|                     | 5.74                                | <b>0.0889</b> | 0.1200        | <b>0.0622</b> |
|                     | 6.25                                | <b>0.0578</b> | 0.1067        | 0.0933        |
| Ni I 352.44         | 2.53                                | <b>0.0711</b> | <b>0.0889</b> | <b>0.0711</b> |
|                     | 3.37                                | <b>0.0667</b> | 0.1067        | <b>0.0889</b> |
|                     | 4.20                                | <b>0.0667</b> | 0.1067        | <b>0.0889</b> |
|                     | 5.04                                | <b>0.0889</b> | 0.1556        | <b>0.0622</b> |
|                     | 5.74                                | <b>0.0800</b> | 0.1067        | <b>0.0711</b> |
|                     | 6.25                                | <b>0.0622</b> | <b>0.0889</b> | <b>0.0711</b> |
| Total sp. intensity | 2.53                                | <b>0.0800</b> | <b>0.0711</b> | <b>0.0667</b> |
|                     | 3.37                                | <b>0.0711</b> | 0.0933        | <b>0.0844</b> |
|                     | 4.20                                | <b>0.0800</b> | <b>0.0622</b> | <b>0.0622</b> |
|                     | 5.04                                | 0.1022        | <b>0.0667</b> | <b>0.0533</b> |
|                     | 5.74                                | 0.1067        | <b>0.0844</b> | <b>0.0711</b> |
|                     | 6.25                                | <b>0.0533</b> | <b>0.0756</b> | <b>0.0800</b> |
| Average             |                                     | 0.0781        | 0.0892        | 0.0694        |
